# Supplementary material for: Population genomics of the endangered giant Galápagos tortoise
Source: PubMed Central journal article supplement (PMC4053747; doi:10.1186/gb-2013-14-12-r136), 2013-12-16
Supplement: gb-2013-14-12-r136-S1.pdf [file gb-2013-14-12-r136-S1.pdf]

0.01

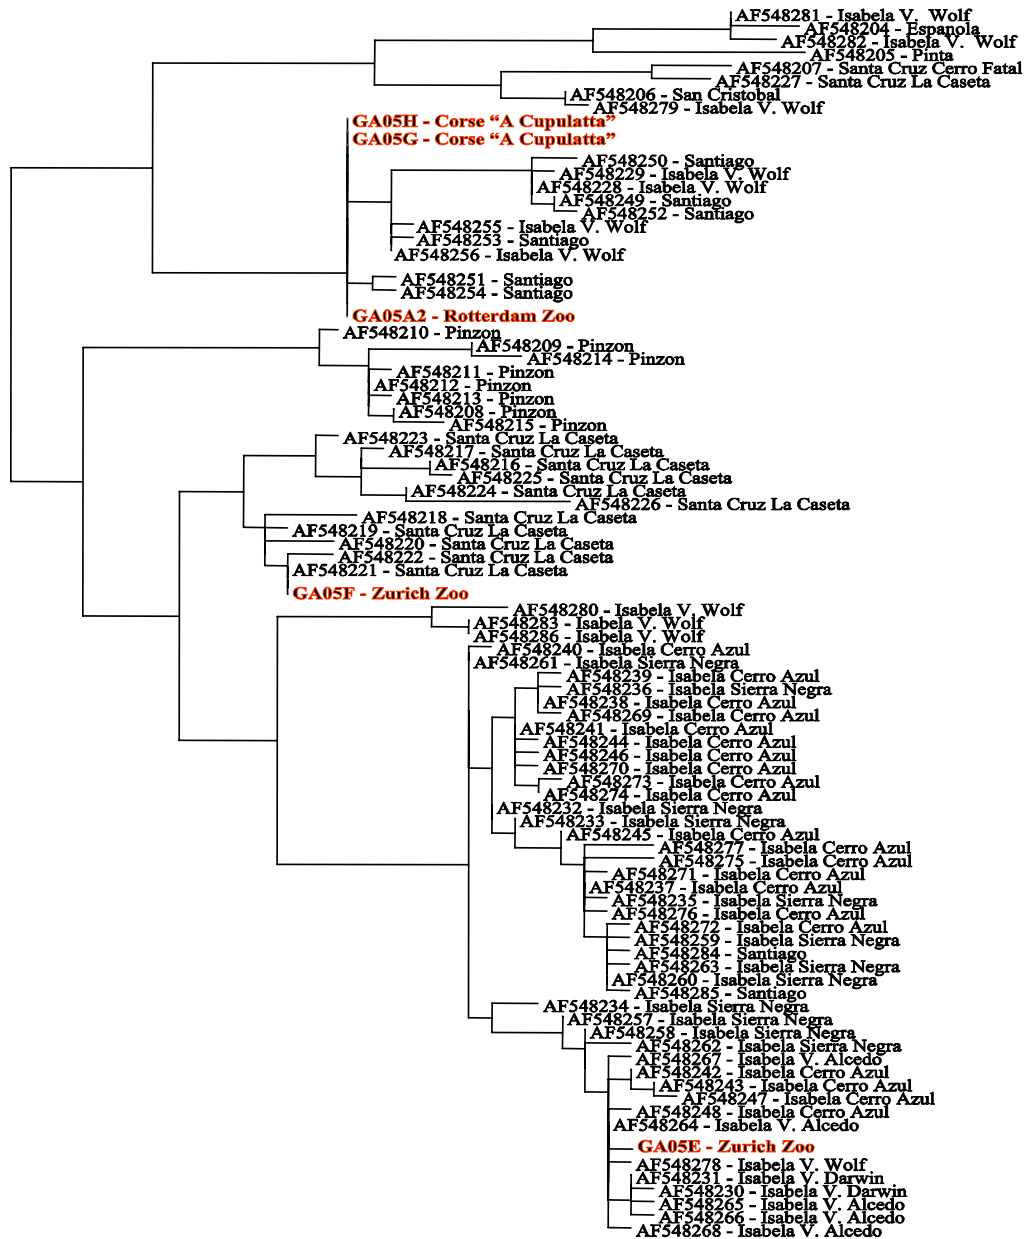

Clade d

Clade c

Clade e
